# Supplementary material for: Methane fluxes from arctic & boreal North America: Comparisons between process-based estimates and atmospheric observations
Source: Copernicus journal article supplement (doi:10.5194/egusphere-2025-2150), 2025-06-04
Supplement: Supplementary file 1 [file egusphere-2025-2150-supplement.pdf]

# Supplement of “Methane fluxes from arctic & boreal North America: Comparisons between process-based estimates and atmospheric observations”

Hanyu Liu<sup>1</sup>, Felix R. Vogel<sup>5</sup>, Misa Ishizawa<sup>5</sup>, Zhen Zhang<sup>4</sup>, Benjamin Poulter<sup>7</sup>,  
Doug E.J. Worthy<sup>5</sup>, Leyang Feng<sup>1</sup>, Anna Laure Gagné-Landmann<sup>3</sup>, Ao Chen<sup>1</sup>,  
Ziting Huang<sup>1</sup>, Dylan C. Gaeta<sup>1</sup>, Joe R. Melton<sup>6</sup>, Douglas Chan<sup>5</sup>, Vineet Yadav<sup>2</sup>,  
Deborah Huntzinger<sup>3</sup>, Scot M. Miller<sup>1</sup>

<sup>1</sup>Department of Environmental Health and Engineering, Johns Hopkins University, Baltimore, MD, USA

<sup>2</sup>Jet Propulsion Laboratory, California Institute of Technology, Pasadena, CA, USA

<sup>3</sup>School of Earth and Sustainability, Northern Arizona University, Flagstaff, AZ, USA

<sup>4</sup>Institute of Tibetan Plateau Research, Chinese Academy of Sciences, Beijing, China

<sup>5</sup>Environment and Climate Change Canada, Toronto, ON, Canada

<sup>6</sup>Environment and Climate Change Canada, Victoria, BC, Canada

<sup>7</sup>National Aeronautics and Space Administration, Greenbelt, MD, USA

Hanyu Liu et al.

Correspondence to: Hanyu Liu ([hliu154@jhu.edu](mailto:hliu154@jhu.edu))

## Contents of this file

1. Tables S1 to S5
2. Figures S1 to S5

## Details on the in situ tower sites

| Tower Site                      | ID  | Lat    | Long    | Elevation (masl) | Intake Height (magl) |
|---------------------------------|-----|--------|---------|------------------|----------------------|
| Abbotsford                      | ABT | 49.0°N | 122.3°W | 60               | 33                   |
| Bratt's Lake                    | BRA | 50.2°N | 104.7°W | 595              | 35                   |
| Barrow Atmospheric              |     |        |         |                  |                      |
| Baseline Observatory            | BRW | 71.3°N | 156.6°W | 11               | 16                   |
| Behchoko                        | BCK | 62.8°N | 115.9°W | 160              | 60                   |
| Cambridge Bay                   | CBY | 69.1°N | 105.1°W | 35               | 12                   |
| Churchill                       | CHL | 58.7°N | 93.8°W  | 29               | 60                   |
| CARVE                           | CRV | 65.0°N | 147.6°W | 611              | 32                   |
| Chapais                         | CPS | 49.8°N | 75.0°W  | 391              | 40                   |
| Egbert                          | EGB | 44.2°N | 79.8°W  | 251              | 25                   |
| Estevan Point                   | ESP | 49.4°N | 126.5°W | 7                | 40                   |
| Esther                          | EST | 51.7°N | 110.2°W | 707              | 50                   |
| East Trout Lake                 | ETL | 54.4°N | 104.9°W | 493              | 105                  |
| Fort Nelson                     | FNE | 58.8°N | 122.6°W | 361              | 15                   |
| Fraserdale                      | FSD | 49.9°N | 81.6°W  | 210              | 40                   |
| Hanlan's Point                  | HNP | 43.6°N | 79.4°W  | 87               | 10                   |
| Inuvik                          | INU | 68.3°N | 133.5°W | 113              | 10                   |
| Park Falls                      | LEF | 45.9°N | 90.3°W  | 472              | 396                  |
| Lac La Biche                    | LLB | 55.0°N | 112.5°W | 540              | 50                   |
| Toronto Atmospheric Observatory | TAO | 43.7°N | 79.4°W  | 100              | 174                  |
| Turkey Point                    | TPD | 42.6°N | 80.6°W  | 231              | 35                   |
| Sable Island                    | WSA | 43.9°N | 60.0°W  | 5                | 25                   |

**Table S1.** Summary of 21 in-situ tall tower sites across Canada and the US, detailing their names, site codes, longitudes, latitudes, elevation (Surface elevation in meters above sea level), and intake height (Sample intake height in meters above ground level (magl)). Note that the abbreviation “CARVE” is short for ‘Carbon in Arctic Reservoirs Vulnerability Experiment.’

## Details on the GCP models

| Model                                  | Spatial Resolution (Rows $\times$ Columns) | References                                                                |
|----------------------------------------|--------------------------------------------|---------------------------------------------------------------------------|
| CH <sub>4</sub> MOD <sub>wetland</sub> | 360 $\times$ 720                           | Li et al., <a href="#">2010</a>                                           |
| CLASSIC                                | 53 $\times$ 128                            | Arora et al., <a href="#">2018</a>                                        |
| DLEM                                   | 360 $\times$ 720                           | Tian et al., <a href="#">2010</a>                                         |
| ELM-ECA                                | 360 $\times$ 720                           | Zhu et al., <a href="#">2019</a>                                          |
| ISAM                                   | 360 $\times$ 720                           | Shu et al., <a href="#">2020</a>                                          |
| JSBACH                                 | 96 $\times$ 192                            | Kleinen et al., <a href="#">2020</a>                                      |
| JULES                                  | 360 $\times$ 720                           | Clark et al., <a href="#">2011</a>                                        |
| LPJ-GUESS                              | 360 $\times$ 720                           | McGuire et al., <a href="#">2012</a> ; Wania et al., <a href="#">2010</a> |
| LPJ-MPI                                | 360 $\times$ 720                           | Kleinen et al., <a href="#">2012</a>                                      |
| LPJ-wsl                                | 360 $\times$ 720                           | Zhang et al., <a href="#">2016</a>                                        |
| LPX-Bern                               | 360 $\times$ 720                           | Spahni et al., <a href="#">2011</a>                                       |
| ORCHIDEE                               | 180 $\times$ 360                           | Ringeval et al., <a href="#">2010</a>                                     |
| SDGVM                                  | 360 $\times$ 720                           | Singarayer et al., <a href="#">2011</a>                                   |
| TEM-MDM                                | 360 $\times$ 720                           | Liu et al., <a href="#">2020</a>                                          |
| TRIPLEX-GHG                            | 582 $\times$ 1440                          | Zhu et al., <a href="#">2014</a>                                          |
| VISIT                                  | 360 $\times$ 720                           | Ito and Inatomi, <a href="#">2012</a>                                     |

**Table S2.** The 16 GCP global wetland flux models that we use in the study, including the number of global latitude and longitude grid cells in each model.

## Details on the wetland to anthropogenic ratios at each in-situ tower site

| Tower Site ID | Biome Type                  | Wetland to Anthropogenic Ratios |
|---------------|-----------------------------|---------------------------------|
| ABT           | Temperate Forests           | 1.06                            |
| BRA           | Temperate Grasslands        | 0.26                            |
| BRW           | Tundra                      | 0.85                            |
| <b>BCK</b>    | <b>Boreal Forests/Taiga</b> | <b>8.79</b>                     |
| <b>CBY</b>    | <b>Tundra</b>               | <b>7.56</b>                     |
| <b>CHL</b>    | <b>Boreal Forests/Taiga</b> | <b>14.00</b>                    |
| <b>CRV</b>    | <b>Tundra</b>               | <b>5.09</b>                     |
| <b>CPS</b>    | <b>Boreal Forests/Taiga</b> | <b>2.51</b>                     |
| EGB           | Temperate Forests           | 0.52                            |
| <b>ESP</b>    | <b>Temperate Forests</b>    | <b>3.57</b>                     |
| EST           | Temperate Grasslands        | 0.34                            |
| <b>ETL</b>    | <b>Boreal Forests/Taiga</b> | <b>1.31</b>                     |
| <b>FNE</b>    | <b>Boreal Forests/Taiga</b> | <b>1.43</b>                     |
| <b>FSD</b>    | <b>Boreal Forests/Taiga</b> | <b>3.93</b>                     |
| HNP           | Temperate Forests           | 0.18                            |
| <b>INU</b>    | <b>Boreal Forests/Taiga</b> | <b>9.17</b>                     |
| LEF           | Temperate Forests           | 0.78                            |
| LLB           | Temperate Grasslands        | 0.62                            |
| TAO           | Temperate Forests           | 0.21                            |
| TPD           | Temperate Forests           | 0.31                            |
| WSA           | Temperate Forests           | 1.07                            |

**Table S3.** The 21 in-situ tall tower sites with biome types and wetland to anthropogenic ratios. The ratios represent averages computed from prognostic and diagnostic model outputs, calculated as the modeled CAMS-derived  $\text{CH}_4$  mixing ratios divided by the modeled mixing ratios using the GCP models. In this study, we define sites with ratios greater than 1.5 as wetland-dominated; however, we also include ETL and FNE because their ratios (1.31 and 1.43) are close to this 1.5 threshold. The sites in bold are the wetland-dominated sites used in our analysis, and we exclude other sites because they are more influenced by anthropogenic emissions.



### Detailed Groupings of Prognostic GCP Models Based on Their $R^2$ Values

| GCP Wetland Models | $R^2$ Values | Group   |
|--------------------|--------------|---------|
| VISIT              | 0.5          | High    |
| CLASSIC            | 0.47         | High    |
| LPJ-wsl            | 0.46         | High    |
| LPJ-MPI            | 0.42         | High    |
| SDGVM              | 0.41         | High    |
| JSBACH             | 0.35         | Average |
| LPX-Bern           | 0.34         | Average |
| ORCHIDEE           | 0.32         | Average |
| JULES              | 0.22         | Low     |
| ISAM               | 0.22         | Low     |
| ELM                | 0.21         | Low     |

**Table S4.** Detailed groupings of Prognostic GCP models based on their  $R^2$  values. The table presents each GCP wetland model alongside its  $R^2$  value and assigned group (High, Average, or Low) as determined by the performance criteria (High > 0.4; Average > 0.3; Low > 0.2).

### Detailed Groupings of Diagnostic GCP Models Based on Their $R^2$ Values

| GCP Wetland Models | $R^2$ Values | Group   |
|--------------------|--------------|---------|
| LPJ-wsl            | 0.53         | High    |
| VISIT              | 0.5          | High    |
| LPJ-MPI            | 0.43         | High    |
| ISAM               | 0.42         | High    |
| CLASSIC            | 0.40         | Average |
| JSBACH             | 0.39         | Average |
| JULES              | 0.39         | Average |
| SDGVM              | 0.37         | Average |
| ORCHIDEE           | 0.34         | Average |
| LPX-Bern           | 0.27         | Low     |
| ELM                | 0.22         | Low     |

**Table S5.** Detailed groupings of Diagnostic GCP models based on their  $R^2$  values. The table presents each GCP wetland model alongside its  $R^2$  value and assigned group (High, Average, or Low) as determined by the performance criteria (High > 0.4; Average > 0.3; Low > 0.2).



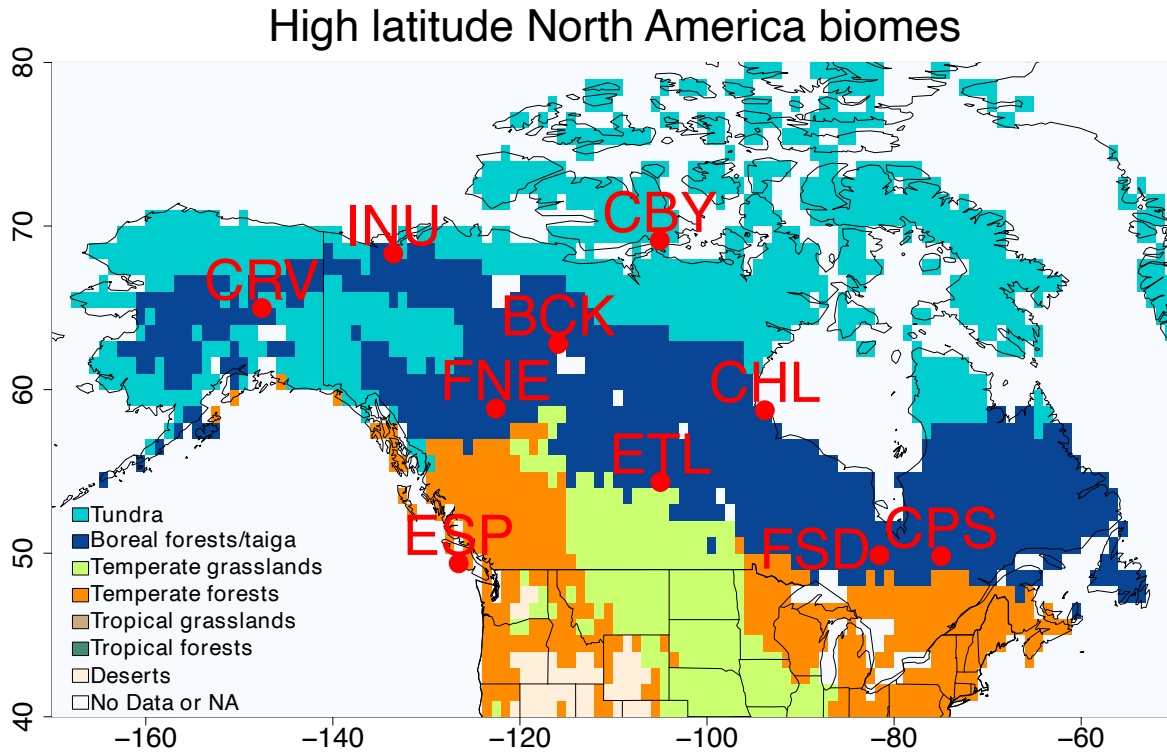

**Figure S2.** Biome map of high-latitude North America highlighting the three out of seven biome types examined in this study: Tundra and Boreal Forests/Taiga, and Temperate Forests. Red dots indicate wetland-dominated measurement sites, comprising a total of ten locations—nine across Canada and one in Alaska. Six sites (FNE, BCK, CHL, ETL, FSD, CPS) are located within the Boreal Forests/Taiga biome, three sites (CRV, INU, CBY) are within the Tundra biome, and one site (ESP) is located in the Temperate Forests biome. The biome map comes from the “Terrestrial Ecoregions of the World” product created by World Wildlife Fund (Olson et al., 2001).

## Correlation Coefficients

CH<sub>4</sub> comparison at wetland-dominated sites: observed vs modeled (GCP) using CAMS

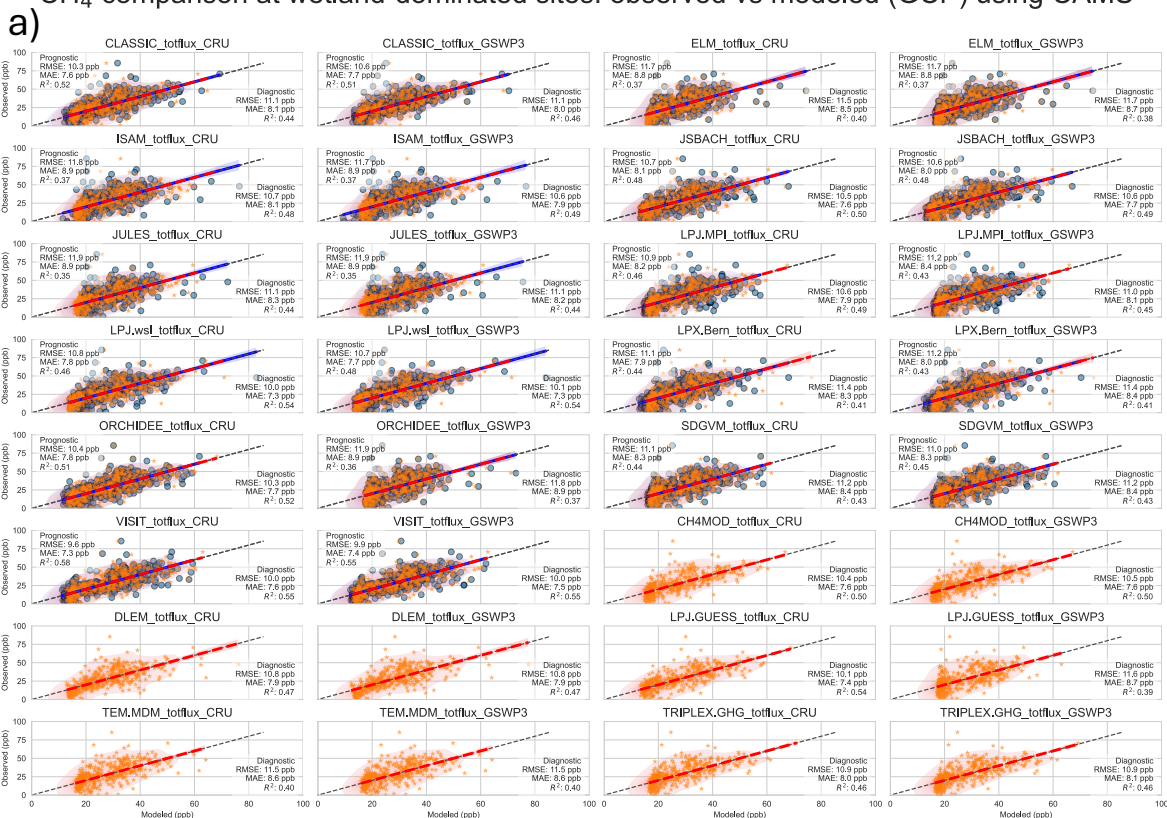

CH<sub>4</sub> comparison at wetland-dominated sites: observed vs modeled (GCP) using CarbonTracker

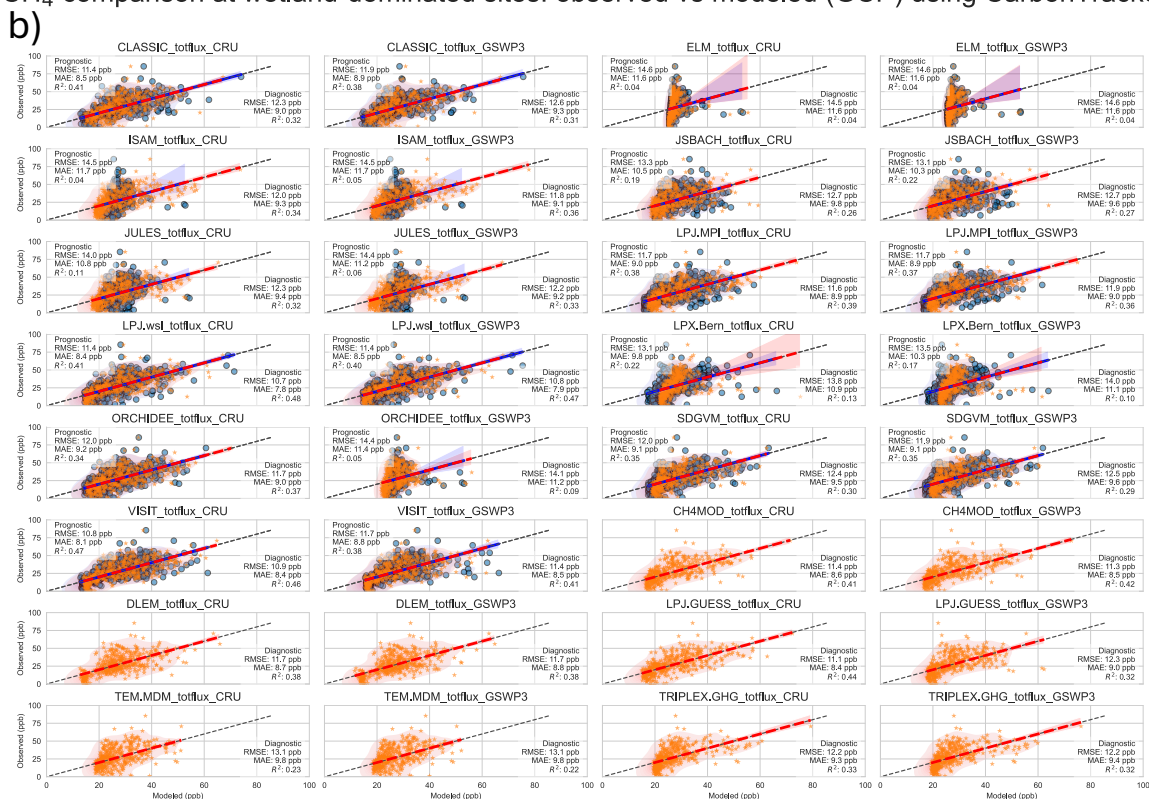

### c) CH<sub>4</sub> comparison at wetland-dominated sites: observed vs modeled (GCP) using EPA

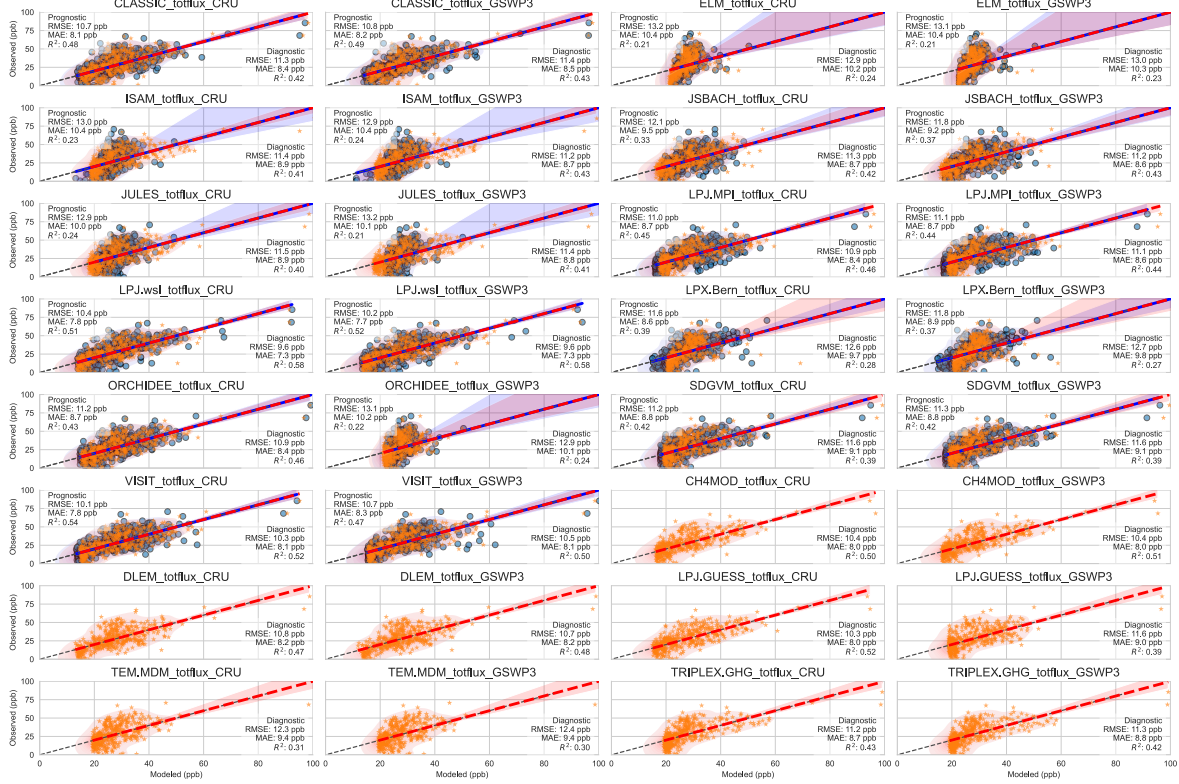

**Figure S3.** The correlation coefficients and  $R^2$  values between the observed CH<sub>4</sub> increments and the predicted values derived from the GCP models using a multiple linear regression approach. The regression results are shown in panel (a) using CAMS as the anthropogenic flux product. In panel (b), we use the CarbonTracker anthropogenic flux product. And in panel (c), we use the combination of the gridded U.S. EPA CH<sub>4</sub> inventory and Scarpelli's anthropogenic CH<sub>4</sub> flux products covering the regions of Canada and Alaska (Maasakkers et al., 2023; Scarpelli et al., 2021). The blue dots represent the regression results using the prognostic GCP models, and the orange dots represent the regression results using the diagnostic models. The black line in each panel is a 1:1 line, and the colored lines show estimated regression lines. The shaded colors represent the 95% confidence intervals of the regression lines.

## Comparisons between GCP models and atmospheric observations by biomes

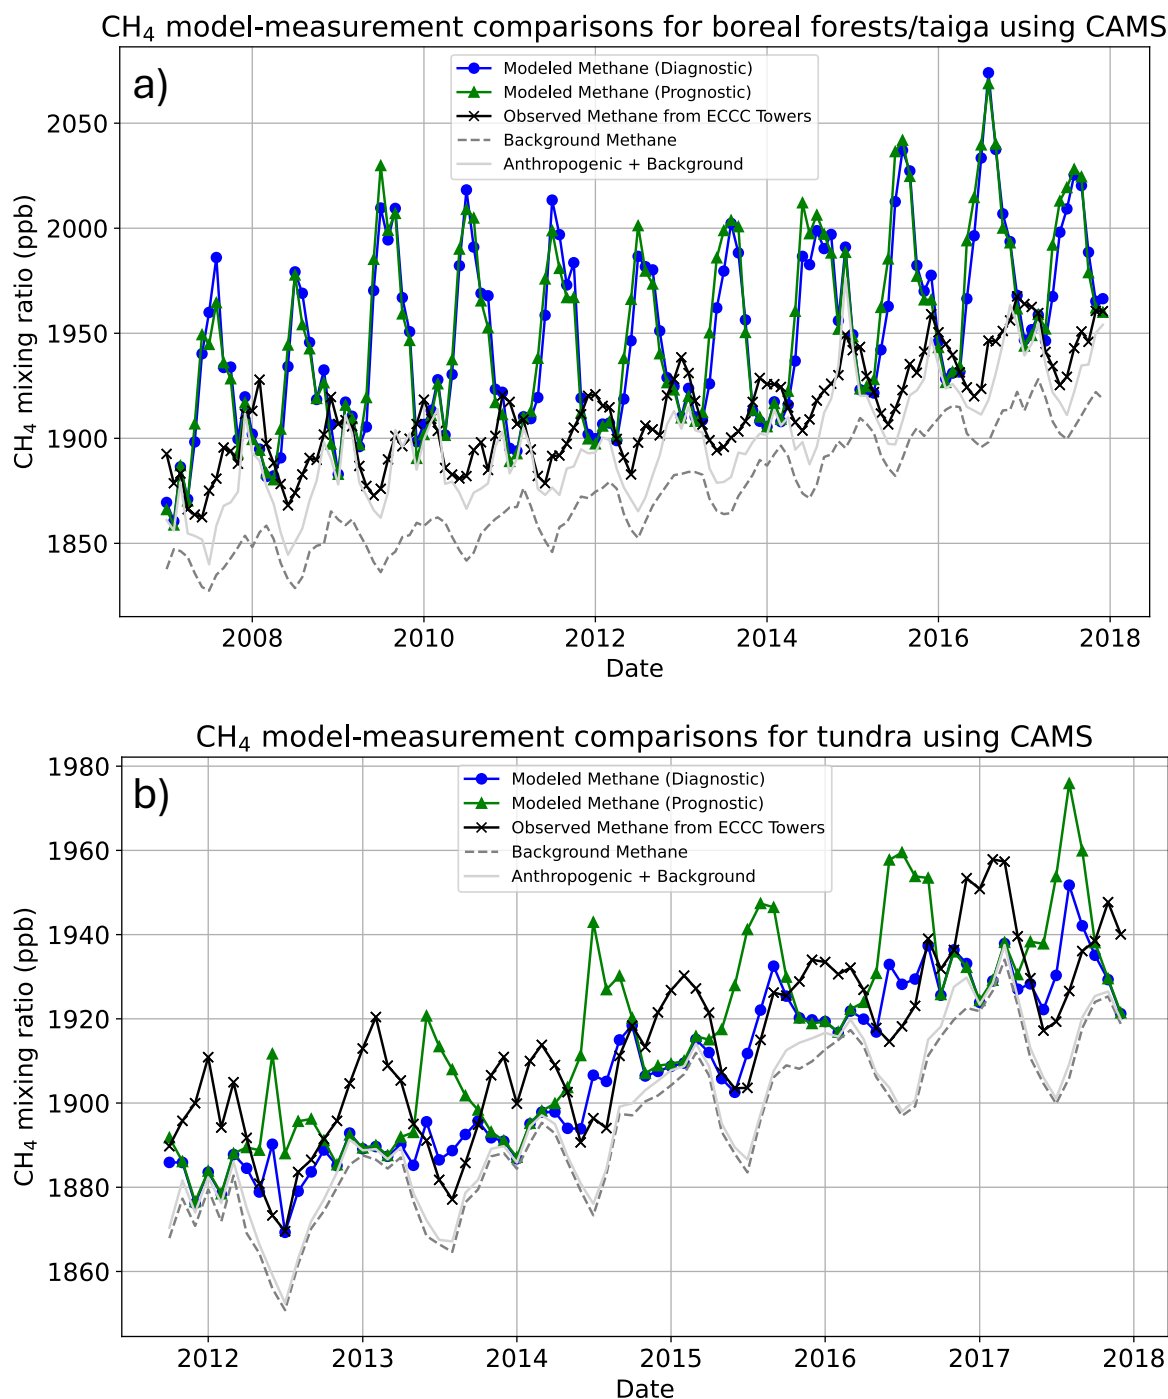

**Figure S4.** A time series of the mean modeled CH<sub>4</sub> mixing ratios using the STILT model with anthropogenic fluxes from CAMS and wetland fluxes set at the mean of the GCP ensemble across different biomes at ten wetland dominated sites between 2007 and 2017. The two panels correspond to: a) Boreal Forests and Taiga and b) Tundra. The dashed gray line represents the boundary conditions, while the solid gray line shows the sum of the boundary conditions and modeled anthropogenic mixing ratios using CAMS. The green line indicates the total modeled mixing ratios from prognostic models, and the blue line represents those from diagnostic models.

## Annual CH<sub>4</sub> flux total using the WETCHIMP models

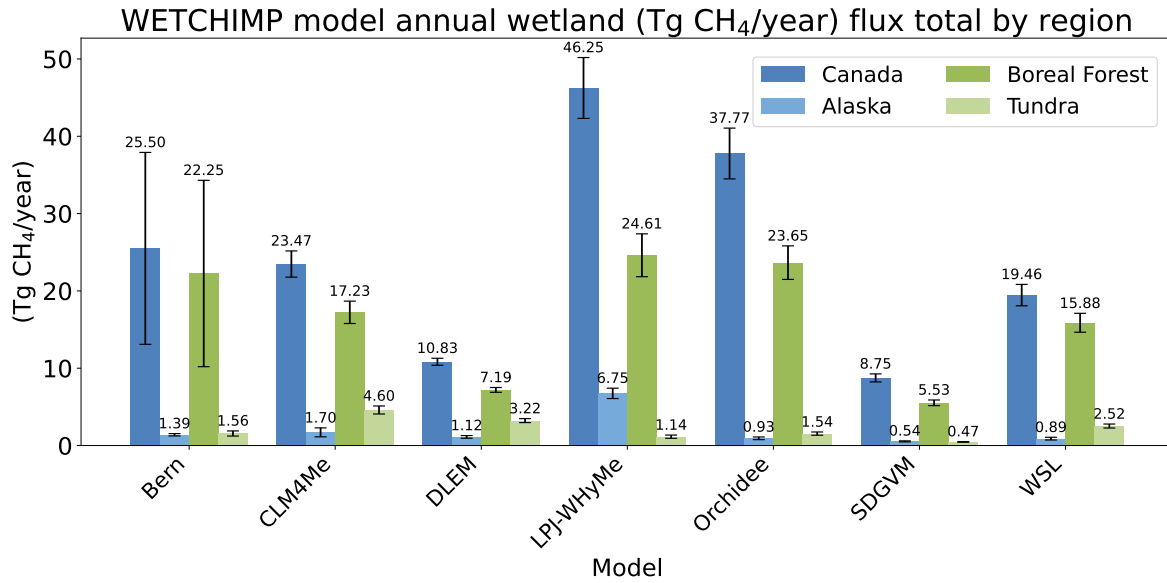

**Figure S5.** Averaged annual CH<sub>4</sub> flux totals by region and biome type using the WETCHIMP models, averaged across years 1993-2004. There are seven total models included (shown on the x-axis), and the y-axis represents the total annual fluxes in Tg CH<sub>4</sub> per year. The uncertainty bars represent the standard deviations of the annual CH<sub>4</sub> flux totals across different years.



## References

- Arora, V. K., Melton, J. R., & Plummer, D. (2018). An assessment of natural methane fluxes simulated by the CLASS-CTEM model. *Biogeosciences*, 15(15), 4683–4709. <https://doi.org/10.5194/bg-15-4683-2018>
- Clark, D. B., Mercado, L. M., Sitch, S., Jones, C. D., Gedney, N., Best, M. J., Pryor, M., Rooney, G. G., Essery, R. L. H., Blyth, E., Boucher, O., Harding, R. J., Huntingford, C., & Cox, P. M. (2011). The Joint UK Land Environment Simulator (JULES), model description – Part 2: Carbon fluxes and vegetation dynamics. *Geoscientific Model Development*, 4(3), 701–722. <https://doi.org/10.5194/gmd-4-701-2011>
- Ito, A., & Inatomi, M. (2012). Use of a process-based model for assessing the methane budgets of global terrestrial ecosystems and evaluation of uncertainty. *Biogeosciences*, 9(2), 759–773.
- Kleinen, T., Brovkin, V., & Schuldt, R. J. (2012). A dynamic model of wetland extent and peat accumulation: results for the Holocene. *Biogeosciences*, 9(1), 235–248. <https://doi.org/10.5194/bg-9-235-2012>
- Kleinen, T., Mikolajewicz, U., & Brovkin, V. (2020). Terrestrial methane emissions from the Last Glacial Maximum to the preindustrial period. *Climate of the Past*, 16(2), 575–595. <https://doi.org/10.5194/cp-16-575-2020>
- Li, T., Huang, Y., Zhang, W., & Song, C. (2010). CH4MODwetland: A biogeophysical model for simulating methane emissions from natural wetlands. *Ecological Modelling*, 221(4), 666–680. <https://doi.org/https://doi.org/10.1016/j.ecolmodel.2009.05.017>
- Liu, L., Zhuang, Q., Oh, Y., Shurpali, N. J., Kim, S., & Poulter, B. (2020). Uncertainty Quantification of Global Net Methane Emissions From Terrestrial Ecosystems Using a Mechanistically Based Biogeochemistry Model [e2019JG005428 2019JG005428]. *Journal of Geophysical Research: Biogeosciences*, 125(6), e2019JG005428. <https://doi.org/https://doi.org/10.1029/2019JG005428>
- Maasakkers, J. D., McDuffie, E. E., Sulprizio, M. P., Chen, C., Schultz, M., Brunelle, L., Thrush, R., Steller, J., Sherry, C., Jacob, D. J., Jeong, S., Irving, B., & Weitz, M. (2023). A Gridded Inventory of Annual 2012–2018 U.S. Anthropogenic Methane Emissions [PMID: 37857355]. *Environmental Science & Technology*, 57(43), 16276–16288. <https://doi.org/10.1021/acs.est.3c05138>
- McGuire, A. D., Christensen, T. R., Hayes, D., Heroult, A., Euskirchen, E., Kimball, J. S., Koven, C., Lafleur, P., Miller, P. A., Oechel, W., Peylin, P., Williams, M., & Yi, Y. (2012). An assessment of the carbon balance of arctic tundra: Comparisons among observations, process models, and atmospheric inversions. *Biogeosciences*, 9(8), 3185–3204. <https://doi.org/10.5194/bg-9-3185-2012>
- Olson, D. M., Dinerstein, E., Wikramanayake, E. D., Burgess, N. D., Powell, G. V. N., Underwood, E. C., D’Amico, J. A., Strand, H. E., Morrison, J. C., Loucks, C. J., Allnutt, T. F., Ricketts, T. H., Kura, Y., Lamoreux, J. F., Wettengel, W. W., Hedao, P., & Kassem, K. (2001). Terrestrial ecoregions of the world: A new map of life on earth. *BioScience*, 51(11), 933–938.
- Ringeval, B., de Noblet-Ducoudré, N., Ciais, P., Bousquet, P., Prigent, C., Papa, F., & Rossow, W. B. (2010). An attempt to quantify the impact of changes in wetland extent on methane emissions on the seasonal and interannual time scales. *Global Biogeochemical Cycles*, 24(2). <https://doi.org/https://doi.org/10.1029/2008GB003354>
- Scarpelli, T., Jacob, D., Moran, M., Reuland, F., & Gordon, D. (2021). *Gridded inventory of Canada’s anthropogenic methane emissions for 2018*. <https://doi.org/10.7910/DVN/CC3KLO>
- Shu, S., Jain, A. K., & Kheshgi, H. S. (2020). Investigating wetland and nonwetland soil methane emissions and sinks across the contiguous united states using a land surface model [e2019GB006251 2019GB006251]. *Global Biogeochemical Cycles*, 34(7), e2019GB006251. <https://doi.org/https://doi.org/10.1029/2019GB006251>
- Singarayer, J. S., Valdes, P. J., Friedlingstein, P., Nelson, S., & Beerling, D. J. (2011). Late holocene methane rise caused by orbitally controlled increase in tropical sources. *Nature*, 470(7332), 82–85. <https://doi.org/10.1038/nature09739>
- Spahni, R., Wania, R., Neef, L., van Weele, M., Pison, I., Bousquet, P., Frankenberg, C., Foster, P. N., Joos, F., Prentice, I. C., & van Velthoven, P. (2011). Constraining global methane emissions and uptake by ecosystems. *Biogeosciences*, 8(6), 1643–1665. <https://doi.org/10.5194/bg-8-1643-2011>



- Tian, H., Xu, X., Liu, M., Ren, W., Zhang, C., Chen, G., & Lu, C. (2010). Spatial and temporal patterns of CH<sub>4</sub> and N<sub>2</sub>O fluxes in terrestrial ecosystems of North America during 1979–2008: application of a global biogeochemistry model. *Biogeosciences*, 7(9), 2673–2694. <https://doi.org/10.5194/bg-7-2673-2010>
- Wania, R., Ross, I., & Prentice, I. C. (2010). Implementation and evaluation of a new methane model within a dynamic global vegetation model: LPJ-WHyMe v1.3.1. *Geoscientific Model Development*, 3(2), 565–584. <https://doi.org/10.5194/gmd-3-565-2010>
- Zhang, Z., Zimmermann, N. E., Kaplan, J. O., & Poulter, B. (2016). Modeling spatiotemporal dynamics of global wetlands: comprehensive evaluation of a new sub-grid TOPMODEL parameterization and uncertainties. *Biogeosciences*, 13(5), 1387–1408. <https://doi.org/10.5194/bg-13-1387-2016>
- Zhu, Q., Liu, J., Peng, C., Chen, H., Fang, X., Jiang, H., Yang, G., Zhu, D., Wang, W., & Zhou, X. (2014). Modelling methane emissions from natural wetlands by development and application of the TRIPLEX-GHG model. *Geoscientific Model Development*, 7(3), 981–999.
- Zhu, Q., Riley, W. J., Tang, J., Collier, N., Hoffman, F. M., Yang, X., & Bisht, G. (2019). Representing Nitrogen, Phosphorus, and Carbon Interactions in the E3SM Land Model: Development and Global Benchmarking. *Journal of Advances in Modeling Earth Systems*, 11(7), 2238–2258. <https://doi.org/https://doi.org/10.1029/2018MS001571>
